# Supplementary figures and images for: An important fingerprint of wildfires on the European aerosol load
Source: Copernicus journal article supplement (doi:10.5194/acp-11-10487-2011), 2011-10-24

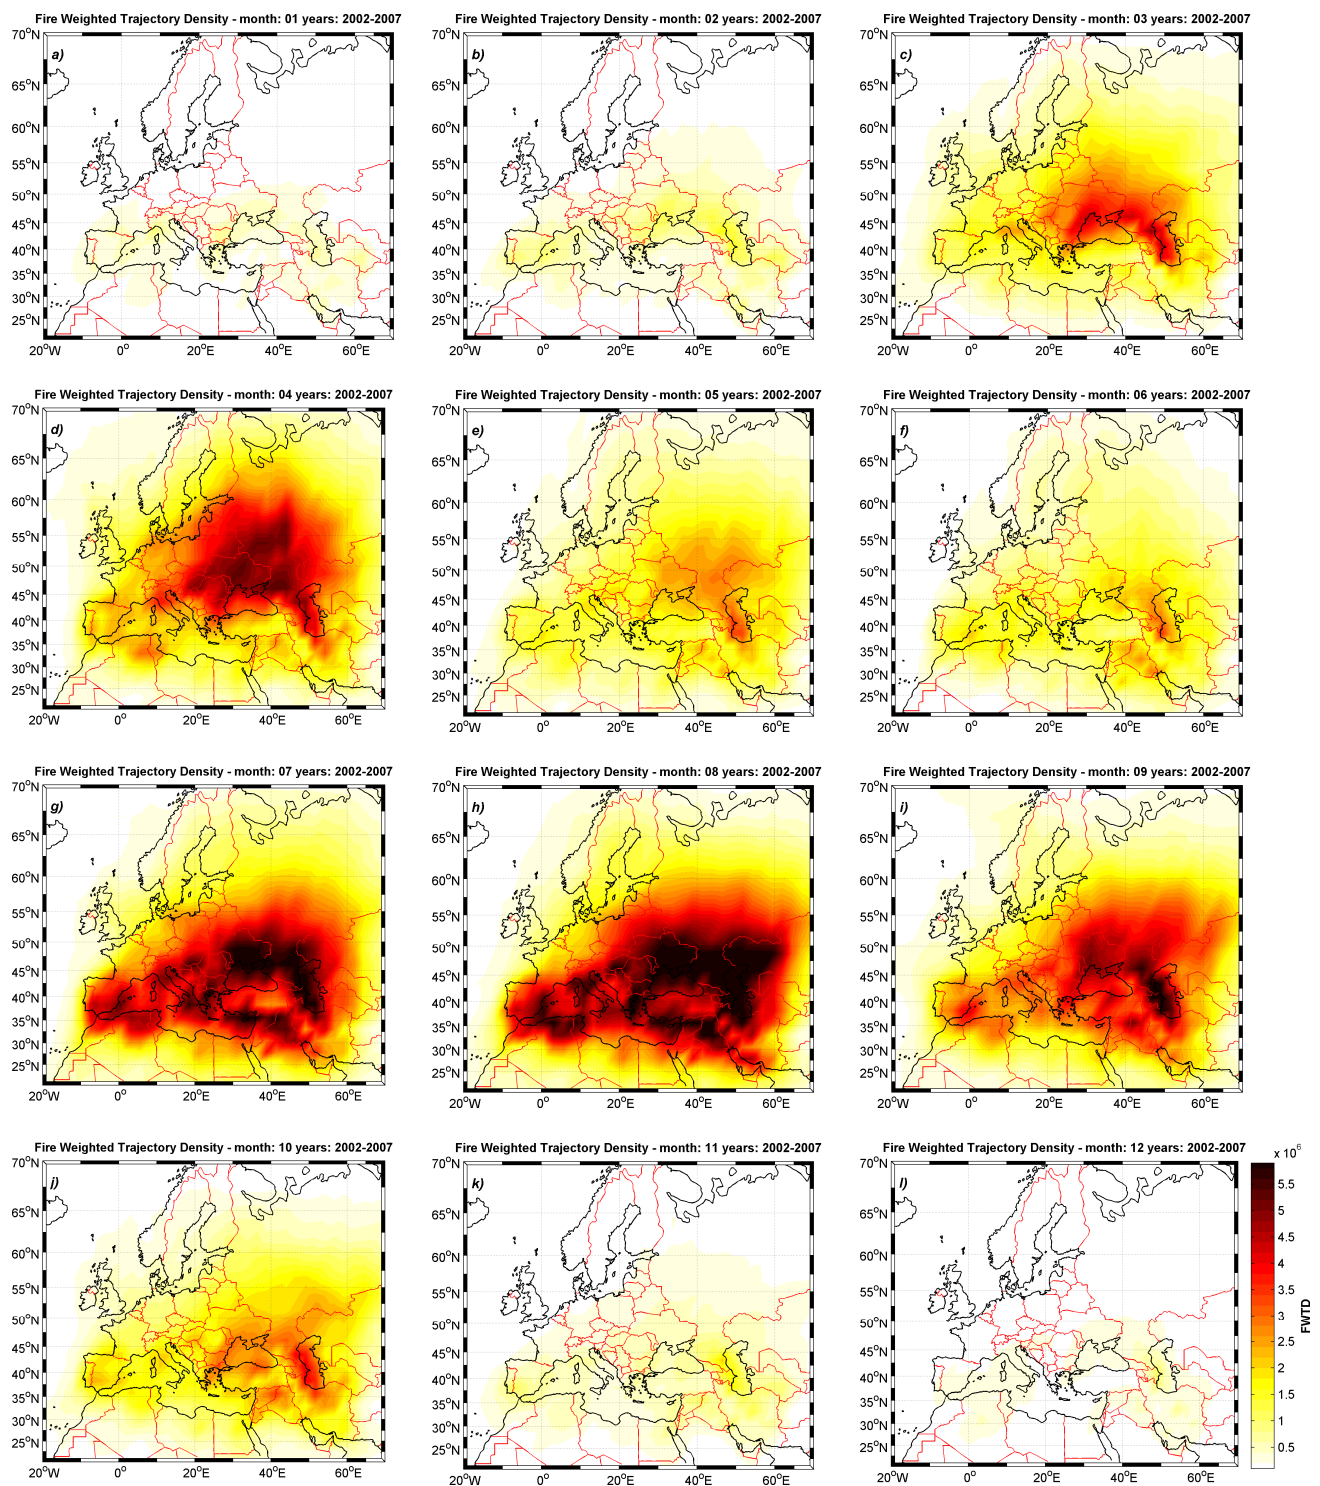

**Figure S1:** FWTD fields obtained for the 12 months of the year (panels a to l) as average over the 2002-2007 period.

Supplement: Supplementary file 1 [file acp-11-10487-2011-supplement.pdf]
